# Supplementary material for: Zoogeographical barriers causing discontinuous osteometrical variations in the northern treeshrew skulls
Source: PubMed Central journal article supplement — J Vet Med Sci. 2021 Aug 12;83(10):1534–44. doi: 10.1292/jvms.21-0322 (PMC8569870; doi:10.1292/jvms.21-0322), 2021-08-12
Supplement: jvms-83-1534-s001.pdf [file jvms-83-1534-s001.pdf]

**Supplementary Table 1. Specimen No. used in this study (male)**

|                                                                                                 |        |        |        |        |        |        |        |        |        |        |        |      |
|-------------------------------------------------------------------------------------------------|--------|--------|--------|--------|--------|--------|--------|--------|--------|--------|--------|------|
| Chiang Rai, Mae Hong Son, Chiang Mai, Nan                                                       |        |        |        |        |        |        |        |        |        |        |        |      |
| Thailand Institute of Scientific and Technological Research, Bangkok                            |        |        |        |        |        |        |        |        |        |        |        |      |
|                                                                                                 | 222    | 226    | 236    | 241    | 2645   | 2650   | 5509   |        |        |        |        |      |
| Tak, Nakhon Sawan, U Thai Thani                                                                 |        |        |        |        |        |        |        |        |        |        |        |      |
| Thailand Institute of Scientific and Technological Research, Bangkok                            |        |        |        |        |        |        |        |        |        |        |        |      |
|                                                                                                 | 3845   | 3846   | 3847   | 4331   | 4332   | 4334   | 5458   |        |        |        |        |      |
| Nakhon Phanom, Udon Thani, Loei, Khon Kaen                                                      |        |        |        |        |        |        |        |        |        |        |        |      |
| Thailand Institute of Scientific and Technological Research, Bangkok                            |        |        |        |        |        |        |        |        |        |        |        |      |
|                                                                                                 | 178    | 179    | 183    | 185    | 200    |        |        |        |        |        |        |      |
| Ubon Ratchathani, Surin, Khorat                                                                 |        |        |        |        |        |        |        |        |        |        |        |      |
| Thailand Institute of Scientific and Technological Research, Bangkok                            |        |        |        |        |        |        |        |        |        |        |        |      |
|                                                                                                 | 194    | 197    | 212    | 1467   | 1468   | 1472   | 1475   | 1477   | 1479   | 1480   | 1485   | 1487 |
|                                                                                                 | 1793   | 1794   | 1795   | 1798   | 3035   | 3037   | 3039   | 3040   | 3164   |        |        |      |
| National Museum of Nature and Science, Tokyo, Tokyo                                             |        |        |        |        |        |        |        |        |        |        |        |      |
| M28532                                                                                          |        |        |        |        |        |        |        |        |        |        |        |      |
| Kanchanaburi                                                                                    |        |        |        |        |        |        |        |        |        |        |        |      |
| National Museum of Nature and Science, Tokyo, Tokyo                                             |        |        |        |        |        |        |        |        |        |        |        |      |
| M23814                                                                                          | M23815 | M23818 | M23819 | M23820 | M23821 | M23823 | M23824 | M23827 | M23837 |        |        |      |
| Prachin Buri, Phetchaburi                                                                       |        |        |        |        |        |        |        |        |        |        |        |      |
| Thailand Institute of Scientific and Technological Research, Bangkok                            |        |        |        |        |        |        |        |        |        |        |        |      |
|                                                                                                 | 221    | 1490   | 1493   | 1495   | 1797   |        |        |        |        |        |        |      |
| Chanthaburi                                                                                     |        |        |        |        |        |        |        |        |        |        |        |      |
| Thailand Institute of Scientific and Technological Research, Bangkok                            |        |        |        |        |        |        |        |        |        |        |        |      |
|                                                                                                 | 2640   | 2643   | 3952   |        |        |        |        |        |        |        |        |      |
| Nakhon Si Thammarat, Krabi, Trang, Pattani, Yala, Narathiwat, Pangha                            |        |        |        |        |        |        |        |        |        |        |        |      |
| Thailand Institute of Scientific and Technological Research, Bangkok                            |        |        |        |        |        |        |        |        |        |        |        |      |
|                                                                                                 | 189    | 191    | 3001   | 3003   | 5580   | 5581   | 5583   |        |        |        |        |      |
| Xiengkhuang                                                                                     |        |        |        |        |        |        |        |        |        |        |        |      |
| Muséum National d' Histoire Naturelle, Paris                                                    |        |        |        |        |        |        |        |        |        |        |        |      |
|                                                                                                 | 359    | 361    | 362    | 863    |        |        |        |        |        |        |        |      |
| Peninsular Malaysia                                                                             |        |        |        |        |        |        |        |        |        |        |        |      |
| Muséum National d' Histoire Naturelle, Paris                                                    |        |        |        |        |        |        |        |        |        |        |        |      |
|                                                                                                 | 567    | 569    |        |        |        |        |        |        |        |        |        |      |
| Department of Wildlife and National Parks, Kuala Lumpur                                         |        |        |        |        |        |        |        |        |        |        |        |      |
| WD0129                                                                                          | WD0163 | WD0293 | WD0378 | WD0398 | WD0501 | WD0525 | WD0530 | WD0536 | WD0541 | WD0546 | WD0587 |      |
| WD0589                                                                                          | WD0601 | WD0603 | WD0605 | WD0700 | WD1105 | WD1146 | WD1274 |        |        |        |        |      |
| Hanoi, Bac Gian, Lao Cai                                                                        |        |        |        |        |        |        |        |        |        |        |        |      |
| Institute of Ecology and Biological Resources, Vietnam Academy of Science and Technology, Hanoi |        |        |        |        |        |        |        |        |        |        |        |      |
| HS03                                                                                            | HS09   | T 05   | T 06   | XS37   |        |        |        |        |        |        |        |      |
| Khanh Hoa, Dong Nai,                                                                            |        |        |        |        |        |        |        |        |        |        |        |      |
| Institute of Ecology and Biological Resources, Vietnam Academy of Science and Technology, Hanoi |        |        |        |        |        |        |        |        |        |        |        |      |
| HB31                                                                                            | IEBR13 | R09    |        |        |        |        |        |        |        |        |        |      |

**Supplementary Table 2. Specimen No. used in this study (female)**

|                                                                                                 |        |        |        |        |        |        |        |        |        |        |        |  |
|-------------------------------------------------------------------------------------------------|--------|--------|--------|--------|--------|--------|--------|--------|--------|--------|--------|--|
| Chiang Rai, Mae Hong Son, Chiang Mai, Nan                                                       |        |        |        |        |        |        |        |        |        |        |        |  |
| Thailand Institute of Scientific and Technological Research, Bangkok                            |        |        |        |        |        |        |        |        |        |        |        |  |
| 223                                                                                             | 225    | 227    | 229    | 230    | 232    | 233    | 235    | 237    | 2639   | 2648   | 2649   |  |
| 5508                                                                                            |        |        |        |        |        |        |        |        |        |        |        |  |
| Tak, Nakhon Sawan, U Thai Thani                                                                 |        |        |        |        |        |        |        |        |        |        |        |  |
| Thailand Institute of Scientific and Technological Research, Bangkok                            |        |        |        |        |        |        |        |        |        |        |        |  |
| 4333                                                                                            | 4335   | 4385   | 5457   |        |        |        |        |        |        |        |        |  |
| Nakhon Phanom, Udon Thani, Loei, Khon Kaen                                                      |        |        |        |        |        |        |        |        |        |        |        |  |
| Thailand Institute of Scientific and Technological Research, Bangkok                            |        |        |        |        |        |        |        |        |        |        |        |  |
| 184                                                                                             | 198    | 199    | 202    | 204    |        |        |        |        |        |        |        |  |
| Ubon Ratchathani, Surin, Khorat                                                                 |        |        |        |        |        |        |        |        |        |        |        |  |
| Thailand Institute of Scientific and Technological Research, Bangkok                            |        |        |        |        |        |        |        |        |        |        |        |  |
| 196                                                                                             | 207    | 211    | 213    | 1462   | 1463   | 1464   | 1471   | 1476   | 1478   | 1482   | 1483   |  |
| 1484                                                                                            | 1486   | 1796   | 3036   | 3038   | 3165   | 3166   | 3167   |        |        |        |        |  |
| Kanchanaburi                                                                                    |        |        |        |        |        |        |        |        |        |        |        |  |
| National Museum of Nature and Science, Tokyo, Tokyo                                             |        |        |        |        |        |        |        |        |        |        |        |  |
| M23809                                                                                          | M23810 | M23811 | M23816 | M23822 | M23825 | M23826 | M23830 | M23831 | M23833 | M23834 | M23835 |  |
| M23836                                                                                          |        |        |        |        |        |        |        |        |        |        |        |  |
| Prachin Buri, Phetchaburi                                                                       |        |        |        |        |        |        |        |        |        |        |        |  |
| Thailand Institute of Scientific and Technological Research, Bangkok                            |        |        |        |        |        |        |        |        |        |        |        |  |
| 219                                                                                             | 220    | 1488   | 1489   |        |        |        |        |        |        |        |        |  |
| Chanthaburi                                                                                     |        |        |        |        |        |        |        |        |        |        |        |  |
| Thailand Institute of Scientific and Technological Research, Bangkok                            |        |        |        |        |        |        |        |        |        |        |        |  |
| 1802                                                                                            | 1804   | 1806   | 2642   |        |        |        |        |        |        |        |        |  |
| Nakhon Si Thammarat, Krabi, Trang, Pattani, Yala, Narathiwat, Pangha                            |        |        |        |        |        |        |        |        |        |        |        |  |
| Thailand Institute of Scientific and Technological Research, Bangkok                            |        |        |        |        |        |        |        |        |        |        |        |  |
| 187                                                                                             | 190    | 2638   | 2999   | 3002   | 5582   |        |        |        |        |        |        |  |
| Xiengkhuang                                                                                     |        |        |        |        |        |        |        |        |        |        |        |  |
| Muséum National d' Histoire Naturelle, Paris                                                    |        |        |        |        |        |        |        |        |        |        |        |  |
| 366                                                                                             | 369    | 643    | 3857   |        |        |        |        |        |        |        |        |  |
| Peninsular Malaysia                                                                             |        |        |        |        |        |        |        |        |        |        |        |  |
| Muséum National d' Histoire Naturelle, Paris                                                    |        |        |        |        |        |        |        |        |        |        |        |  |
| 185                                                                                             | 568    |        |        |        |        |        |        |        |        |        |        |  |
| Department of Wildlife and National Parks, Kuala Lumpur                                         |        |        |        |        |        |        |        |        |        |        |        |  |
| 5456                                                                                            | M129   | WD0079 | WD0095 | WD0107 | WD0120 | WD0126 | WD0209 | WD0211 | WD0213 | WD0324 | WD0428 |  |
| WD0436                                                                                          | WD0485 | WD0497 | WD0498 | WD0536 | WD0538 | WD0542 | WD0544 | WD0545 | WD0553 | WD0568 | WD0577 |  |
| WD0584                                                                                          | WD0611 | WD0644 | WD0671 | WD0695 | WD0700 | WD0701 | WD0756 | WD1147 | WD1268 | WD1276 | WD1278 |  |
| Hanoi, Bac Gian, Lao Cai                                                                        |        |        |        |        |        |        |        |        |        |        |        |  |
| Institute of Ecology and Biological Resources, Vietnam Academy of Science and Technology, Hanoi |        |        |        |        |        |        |        |        |        |        |        |  |
| HS02                                                                                            | HS04   | HS05   | HS08   | HS10   | M553   | T 04   | XS07   |        |        |        |        |  |
| Khanh Hoa, Dong Nai,                                                                            |        |        |        |        |        |        |        |        |        |        |        |  |
| Institute of Ecology and Biological Resources, Vietnam Academy of Science and Technology, Hanoi |        |        |        |        |        |        |        |        |        |        |        |  |
| HB01                                                                                            | HB29   | HB32   | R01    | R21    |        |        |        |        |        |        |        |  |
